# Supplementary material for: Toxoplasma gondii Investigation of Home-Reared Pigs through Real-Time PCR and Digital Droplet PCR: A Very Low Prevalence
Source: MDPI journal article supplement (doi:10.3390/pathogens12070882), 2023-06-27
Supplement: s1 [file s1]

# Survey

Farm Code: .....

Address: .....

City: .....

Veterinary District/Province of competence: .....

## Context:

- ☐ Woodland environment
- ☐ Countryside
- ☐ Peri-urban
- ☐ Urban

Total N of pigs: .....

Total N of fences: .....

N of pigs in sampled pen: .....

Age at placement: .....

Duration of placement:

- ☐ 3-6 months
- ☐ > 6 months

## Features:

Type of pigsty:

- ☐ masonry
- ☐ open
- ☐ open with roof
- ☐ other .....

Fully fenced pigsties

- ☐ yes
- ☐ no

Type of flooring:

- ☐ concrete
- ☐ ground
- ☐ other .....

Presence of wild animals nearby

- ☐ yes
- ☐ no
- ☐ if yes, specify which .....

Interaction between pets and pigs:

- ☐ yes
- ☐ no
- ☐ if yes, specify which .....

Feeding with specific feed

- ☐ yes
- ☐ no
- ☐ if yes, specify which .....

Feeding with kitchen leftovers:

- ☐ yes
  - ☐ if yes
  - ☐ raw
  - ☐ cooked
- ☐ no

Date:.....

Signature:.....

## Privacy Policy Statement

This survey is provided in respect of the privacy of its users and treats the information provided for specific research or education purposes in a confidential matter. Our Board is committed to maintaining the accuracy, confidentiality, and security of any personal information that is under its control and no sensitive data will be disclosed.
